# Supplementary material for: Differential microRNA Analysis of Glandular Trichomes and Young Leaves in Xanthium strumarium L. Reveals Their Putative Roles in Regulating Terpenoid Biosynthesis
Source: PLoS One. 2015 Sep 25;10(9):e0139002. doi: 10.1371/journal.pone.0139002 (PMC4583480; doi:10.1371/journal.pone.0139002)
Supplement: S4 Table — (XLSX) [file pone.0139002.s004.xlsx]

## Sheet: novel_miRNA
Table S4 Analysis of novel miRNAs in leaves and glandular trichomes of X. strumarium
miRNA name	Leaves count	Glandular trichomes count	Novel miRNA sequence	miRNA length (nt)	Location	Folding energy (kcal mol-1)	Precursor sequence	Precursor length (nt)	Precursor structure
novel_mir_21	55156	61105	TTAAAGCTCAGGAACACGTCAT	22	Unigene50427_All:68:156:-	-43.2	GCGGCGACTCTTAAAGCTCAGGAACACGTCATGATTACGAGTTTGTTTTCTCGAGACATGTCGTGTTCTTGAGATTTAGAAACGCCGTC	89	((((((..(((.(((.((((((((((((.((((.((.((((........)))).)))))).)))))))))))).))))))..)))))).
novel_mir_19	7356	14153	TGGTTAGTTACAAGGTCGTTA	21	Unigene45376_All:426:579:+	-53.21	TGAATTGATCTGGTTAGTTACAAGGTCGTTAAGACCCCCACCTCCATTATCAAAACCATTCTCCTCTGCTGATGCAACCTGATGAAGGGATATGGTCTCATGGTACCAAAGTGGAATAGCCTTTAACGACCTTGAAATTAACCAGATGAATTAA	154	..((((.((((((((((((.(((((((((((((....((((......(((((..(((((((((.(((((....))).......)).)))).)))))....))))).....)))).......))))))))))))).)))))))))))).))))..
novel_mir_12	1279	1517	TTATGAAGGTAGTCTAGCCCAC	22	Unigene14670_All:188:395:-	-101.8	TTGTGTTTGATAACAATGGATTATGAAGGTAGTCTAGCCCACAGATAACACAAATGAATATCTAGAGGTATTAGTTTCAGAGTGTGACATGTGTGTTCACAAATTGTGTTGTAGATGTCTCACGCTGGAACCTGATGTGCTCTAGATAAGCATTGGTGTTGTGTGTGGGCTGGCTTACCGTCATAATCCTTTGTTGTTAGGGCGGATA	208	((((.(((((((((((.(((((((((.(((((.((((((((((.(((((((.((((..((((((((((((((((((((((.(((.(((((.((....(((.....)))...)).))))).))).)))))).))))))).)))))))))..)))).))))))).)))))))))).))))).))))))))).)))))))))))))))...
novel_mir_20	1337	1339	GCGGCATCTTCAAGATTCACA	21	Unigene47548_All:79:173:+	-41.9	GCTTACTGGTGCGGCATCTTCAAGATTCACATGCCGGTCAACTCTACTGTTACTGTCCCGCTACTGAGAATCTTGATGATGCTGCATCGGAAATC	95	.....(((((((((((((.(((((((((.((.((.((.((((......))...)).)).))...)).))))))))).))))))))))))).....
novel_mir_14	202	1094	TGGTGCAGTTCGGGAACGGTT	21	Unigene24102_All:169:298:+	-57	ACAGCTGTCTCTGATTCGCTTGGTGCAGTTCGGGAACGGTTTCGCCCTCGATGTCAAGATTTTGTCATACAGATTCATTTCGGTGAAAACCGATCCCGCCTTGCATCAAGTGAATCCGAAACTGCCGTGA	130	((.((.((.((.((((((((((((((((..(((((.((((((((((...(....)..((.((((.....)))).)).....)))).)))))).)))))..)))))))))))))))).)).)).)).))..
novel_mir_16	256	355	TGGAGAAGCAGGGTACGTGCA	21	Unigene34645_All:116:352:-	-68.57	CTGATCAAGATGGAGAAGCAGGGTACGTGCATTACTAAATCATCATGGAAAATAACAAACACCAAAACTTTAACTTGATCTCTTCTGTCTTTAAACCATCATAAATTAAATGTTTTTTTTTTCACTCTTTAGTTTGATGACACCATATAGCCTAGTACCCTTTGGTTAGGGGTTCATGTTTGGCATGAGATCAAATGAGTTAGTGGTTCATGTGCCCATCTTCGCCATCATGACCAC	237	.((.(((.(((((.((((..(((((((((.((((((((.(((...(((.............)))..........((((((((...((((.((((((...........(((.......)))...........)))))).)))).......(((....((((((.....))))))........)))..)))))))).))).)))))))).)))))))))..)))).))))).))).)).
novel_mir_17	68	121	TGGTTAGTTGCAAGGTTGTTA	21	Unigene39751_All:1:258:-	-73.1	GATCTGGTTAGTTGCAAGGTTGTTAAGACCACCACCTCCATCATCCCTCACTGCTGATGCAACCAGCTTTACCAAATTTTCTTTTTCTTCACTTAGCTTAGTTTCCTGTTCTCACAAATAAAAATGTTGATTAGTTTCGTATTATTGTGTTTAATCAAGCTCTAATCATAGCCGTGCTTCCAAACAGGACAAAGGTATATGGTCTCATGGTACCAAGGTGATCAACTGATCTTTAACGACCTTGCAATTAACCAGATG	258	.(((((((((((((((((((((((((...................(((...((((.(((..((((....((((.................(((......))).(((((((..(((...........((((((((...((......))...))))))))(((........))).)))......)))))))....))))..))))..)))))))...))).((((....)))).))))))))))))))))))))))))).
novel_mir_13	105	56	GGAATGTTGTCTGGCTCGAGG	21	Unigene17584_All:84:269:+	-60.3	TTCTTTGTGGGGAATGTTGTCTGGCTCGAGGACACAAGAAAGCTTCAATATCTTATAGTCTTTATGTTTCATAATCACAAAATGGGTCAATCTCTCTTGATCAATGATTAAAGATTAGTTTTAACTAAGCCAATCTTAATTGTAGAATTTGGTGTCGTCGGACCAGGCTTCATTCCCCTCAGATGT	186	...((((.((((((((..((((((..(((.(((((..(((..((.((((........((..(((((...)))))..))......((((((......))))))........((((((.((((.....)))).)))))).)))).))..))).))))).)))..))))))..)))))))).))))...
novel_mir_22	17	111	TGCTCACTTCTTTTGCTGTCGGG	23	Unigene9107_All:1:102:+	-40.8	TGACAGAAGAGAGTGAGCACACGCCTGCAATTGTATATAGAGATTATACACTTGTTGAAATTATGTGTGTGCTCACTTCTTTTGCTGTCGGGTCCTATTCTT	102	.(((((((((((((((((((((((..((((.((((((.......)))))).)))).........)))))))))))).)))))).))))).............
novel_mir_15	34	46	TGCTCACTTCTCTTGCTGTCAGC	23	Unigene3449_All:239:449:+	-46.19	CTTATGCGTGTGCTCACTTCTCTTGCTGTCAGCCCTTACTCTTTCTTTCTCCTTGTATGTGTATGTTTTAATCTTCATCTTCATCTTGATATTGATATTATGAGTGTGCTTTACCATCTTTACTATCTTTTTGTTTTTGTGTTTGTGTGGGATGAGGTTATGTGTGTGTGAGTGGGAATATAATGATATATGAGGTGAGTGGGTGTATTTT	211	...(((((..((((((((((...((.(((((...............(((((((..((((..((((.......((((((((.(((...(((((.((((.....((((..............)))).......))))...)))))...))))))))))).))))..))))..)).))))).....))))))).))))))))))..)))))...
novel_mir_11	30	45	TTGCGGATTTGGAAAGGTGTA	21	CL8797.Contig1_All:374:440:-	-23.1	AAGTTGCGGATTTGGAAAGGTGTACGACATATGTGGAGAGGTTGTAACACCTCGAAATCCCGATTTG	67	((((((.((((((.((..((((((((((............))))).))))))).)))))))))))).
novel_mir_18	25	16	TGGATCCATCTGAAGTGCGTA	21	Unigene41992_All:155:264:-	-23.3	TGGTGCTTAAACGAGCTTGTCAAGATTATGGATTGTCAGAGGATGAATGAACAAACTGCTTACCCTGTGTTTTATGATGTGGATCCATCTGAAGTGCGTAATCAGCATGG	110	..((((......((.....))..(((((((.(((.(((((((((..((....((((.((.......))))))......))..)))).)))))))).))))))).))))..
novel_mir_2	2481	0	TCGAGAGAAGGCGGATGCTCC	21	CL11420.Contig1_All:279:371:+，CL11420.Contig2_All:541:633:+	-29.8	GACCTTTGAATCGAGAGAAGGCGGATGCTCCCAGAACAGACCGAACGTTTGCTTCTTTTGAAGCTTCTCGTTTTTCTCTTGATTTATTTTTCG	93	((....(((((((((((((((((((.((((..(((((((((.....))))).))))...).))).)).)).)))))))))))))))....)).
novel_mir_27	0	317	TGGTGGATCACCAGCTCCGTCG	22	CL5715.Contig2_All:206:303:-	-30.94	CCCCCTTACCCGACGGCGTACCGGTTCACCGTCCTCAGCATGCCCGTGTGCCCAACCACCAGGTGGTGGTGGATCACCAGCTCCGTCGCCCCCGTGGC	98	.((.......((((((.((...(((((((((.((...(((((....)))))...(((....))))))))))))))....)).)))))).......)).
novel_mir_32	0	45	GTTCAATAAAGCTGTGGGAAG	21	Unigene3168_All:70:181:-	-45.2	GCTATTTCTATCCTTCCACGGCTTTCTTGAACTGCATGTGTTTGATCTATCAGATCTGTGTTTTTATATTTAATCTTTGCGGTTCAATAAAGCTGTGGGAAGATAGAGACAG	112	.((.((((((((.((((((((((((.((((((((((.......((((.....)))).((((....))))........)))))))))).)))))))))))).)))))))).))
novel_mir_7	38	0	TCAAAGAACTTGAGAAAGCAT	21	CL3548.Contig1_All:2008:2118:+,CL3548.Contig2_All:1872:1982:+	-25.8	GGAGTCATCATCAAAGAACTTGAGAAAGCATTAAACTTTCAAGTAAGCAACGCATTTCAAAATGTGACTTTCTTTCTTATCTCCGTATTCTCGATCTTTGATAGTGAGTAG	111	..(.((((.((((((((..(((((((.((.....(((....)))......((((((....))))))..................)).))))))))))))))).)))).)..
novel_mir_1	32	0	TGGCTAAAGGAGTAGGTACCA	21	CL1089.Contig1_All:679:778:+	-44.4	AAGTGTTGGATGGCTAAAGGAGTAGGTACCATTTTCGTTGGCATAGAAATTTTTCTATTTCGGCAAAAATGGCGTCTGCTCCTTTATAGCCCTCAAGCTA	100	.(((....((.(((((((((((((((..(((((((.(((((.((((((....)))))).))))).)))))))..))))))))))..))))).))..))).
novel_mir_3	22	0	ACGACCTTGCAATTAACCAGA	21	CL11740.Contig1_All:1:148:+	-50.4	GGTTAGTTGCAAGGTTGTTAAGACACCTACCTCCATCAGTAACAGCATCCTCCTCCTTTGTTGATGCAACCTGACAAAGGCATATGGTTCAATTGTACCAAGGTGAAATAGTCTTCAACGACCTTGCAATTAACCAGATGAATTAGCC	148	((((((((((((((((((((((((.....(((...((((.....(((((..(.......)..)))))...))))...)))(((.((((........))))..))).....))))).))))))))))))))))))).............
novel_mir_34	0	16	ACCACAGGCAGAATCTGACAT	21	Unigene3851_All:64:235:+	-92.76	TTCCGCTTGTACCACAGGCAGAATCTGACATTCTTGTGATCATTCCACTTGTACCATAAGCGGAATATGACGTTCTTACAGCAACTTCACTCACCAGTTTTCCCTATTCCGCTTTTGGTACAAGCGGAGCGACCACAAGAATGTCAGATTCCGCTTATGGTACAAGAGGAAT	172	((((.(((((((((.((((.((((((((((((((((((.((.((((.(((((((((.(((((((((((((.((((.....).))).)))...............)))))))))).))))))))).)))).)).)))))))))))))))))).)))).))))))))).)))).
novel_mir_24	0	15	TCAAAGAACTTGAGAAAGCATT	22	CL3548.Contig1_All:2008:2118:+,CL3548.Contig2_All:1872:1982:+	-25.8	GGAGTCATCATCAAAGAACTTGAGAAAGCATTAAACTTTCAAGTAAGCAACGCATTTCAAAATGTGACTTTCTTTCTTATCTCCGTATTCTCGATCTTTGATAGTGAGTAG	111	..(.((((.((((((((..(((((((.((.....(((....)))......((((((....))))))..................)).))))))))))))))).)))).)..
novel_mir_8	15	0	CTTCAGTAGTTGTATTGTCTG	21	CL7081.Contig2_All:229:465:-	-63.9	GGCATCTTCTTCTACTGCTGCTGCTGAAGCTTGCATCTATGATGTGTTTCTAAGTTTTCGAGGTGAAGATACCCGACATTCTTTTACCGATCATCTTTACCATAGATTAAAGCGAGCTGGTATTCATACTTTTAGAGATGATGAAGAACTCAACCGAGGCGAAGAACTGAAACCTGAAATTGAGAGAGCAATCAAAGCATCTAAGGCTTCAGTAGTTGTATTGTCTGAGAAGTATGC	237	.((((((((((..(((((.(((((((((((((........((((((((((....((((((.((((((((..........)).)))))).((((((((((.....((.((.((....))..)).)).......))))))))))......(((....))).))))))...)))))......((((........)))).)))))..))))))))))))).)))..))..)))))).))))
novel_mir_26	0	13	TGGGAATTACTGGAGACAGATGA	23	CL5359.Contig1_All:375:440:+	-21.5	CGGCCCGTTATGGGAATTACTGGAGACAGATGAAGAAGATCTGTACTTTAGAACTCCTTAGTGCCA	66	.(((.(.....((((.((.((((((((((((.......)))))).)))))))).))))..).))).
novel_mir_23	0	12	TTTATGTTCGTGAACGTTCGGTA	23	CL12282.Contig1_All:596:669:+	-19.7	TGTTCGTTCGTTTATGTTCGTGAACGTTCGGTAACGTGTTCGTTTACGTTCATTCGTTTATGATCGTTTGAAGA	74	..((((..((.(((((..(((((((((.(((........)))...)))))))..))..))))).))..))))..
novel_mir_9	11	0	GGATAACCTGACCACAACGCATA	23	CL8431.Contig2_All:1:323:+	-56.08	GGATAACCTGACCACAACGCATAGTCTTAGGAACCTAAATAACAGGAAAACAGAGCATTTCAAGCAGCCAAAATAATCTCTTTTTTCTTTCTTTCAATTGCTTCCGTTCAAAGTAACCAAACAAGGTTTTTCTCCTTCCATTTACTACCTAACAAACACAATTTATTCAGGCTATGAAATTAGTGACAGAACCACCACCACTTTACATAAAAAGGAAGGGATGAAAATGGTACAAATAGTCATAATGAAAATTGATATCATGATGAAACCCATTCAGACCGGTGTCTTGAGCAAAACAGGGGAGCGCTTGTTATCGTTGTCTT	323	(((((((..((..(((((((......((((....)))).....(((((((.((((.(((...............))))))).)))))))(((((...((((((..((((..(((((......((((.......))))....)))))..........(((((((...(((.....))))))).)))...))))...((((.((((......))))((((((......((((((..(((..((.....))..)))..)))))).......))).))).....))))....))))))...))))).))).))))..))))))))).
novel_mir_35	0	11	TGGACATAAGGCACATAACAC	21	Unigene41899_All:76:156:-	-21.2	CATCAATGCTTGGACATAAGGCACATAACACTTAGGTGTTGTTTGTTTTTGAGGAGGTAAAAGGTCTGAAGTATGCGGACC	81	......(((((...((.((((((.(((((((....))))))).))))))))...)))))...((((((.......))))))
novel_mir_36	0	11	TCATGTCACAAGGTAGTTTGA	21	Unigene47346_All:219:412:-	-61.77	GTTTATGAGTTCATGTCACAAGGTAGTTTGAAAAATCATTTATTCAGGTTAATCATGTGTTCCGAACTGCCCATGAAAGTCCTCACGTTGAAAAAACTTATCACCATTTGAAACTTCCATCTTATCGTAGGAAATTATGACTTCCCATGAATAAATGATTATCCAGGCTTCCTTTTGACATGAATTCACAAACC	194	((((.(((((((((((((.((((.((((((...(((((((((((((((..(.(((((..((((.........(((.((((..(((.(((((.........)))..)).))).)))).))).........))))..))))).)..)).)))))))))))))...)))))).)))).))))))))))))).)))).
novel_mir_5	10	0	TCTCTATGTAGATGATATGCTT	22	CL1502.Contig3_All:1617:1699:+	-26.3	TTATTTTATGTCTCTATGTAGATGATATGCTTATCATTGGGAGTAATGATAAGATTATCAAATCTACTAAAGACATGTTAAAA	83	......(((((((.((.((((((((((..((((((((((....))))))))))..)))))..))))))).)))))))......
novel_mir_4	9	0	TTGAGTGTTCTATGGATTTGA	21	CL12505.Contig1_All:249:353:-	-27.1	CATGATCTTCACAAGTTCATCCAAGCACCAAGATGAAGATGCATAGTTTTTGGAGAAAACAATTATGTGGAACCTTGAGTGTTCTATGGATTTGATGATATCATC	105	.(((((..((((((((((((...(((((((((.......(((((((((.((......)).)))))))))....)))).)))))..))))))))).))).))))).
novel_mir_10	7	0	TACGCAATAAGGTGCACTATC	21	CL8439.Contig2_All:282:541:-	-95.8	AAAACCTCCTAATAGTGCAACCTATCGTGTAGACTTCCCATGTGGGTGTCCAACCTATCCTGACCCACCTCAGTTGGAGAGCTTAGCAGAAGCACGACTTATAGAACCACCCAGAAAGGTGAGGAAATAGGTGGCATATCTAACCACTATGTTGGGCAATATGAGTTCGAGAGATCGCGCAACAGTCACAAGGTGTGTGGGATATGTTGGACATCCATATCAATAAGTTTACGCAATAAGGTGCACTATCATGAGATTTT	260	.....(((...((((((((.(((((.((((((((((...(((((((((((((((.((((((.((.(((((..((((((..((((.....)))).(.((((((....(((((......)))).)...)))))).)....)))))).....(((((.((.....((..((....)))))).)))))......))))).)))))))).)))))))))))))))....)))))))))).)).)))))))))))...))).....
novel_mir_29	0	7	GATGATGATTGTGGGTTCAAA	21	CL8967.Contig3_All:521:700:-	-43.34	GGCAAAACCATATGTGAATCCTTGATCATTGTCCGTTACATCGATGAAACATGGAAACAAGGATGTTCTTTGTTACCTTCTGATCCTTATCTCAAATCTCAAGCTGCCTTTTGGGCTGATTACGTTGATAAACATATATATGATGGTGTGATGATGATTGTGGGTTCAAAAGGTGAGGAG	180	..(...(((.....(((((((.(((((((..((((...(((((.........((.(((((((.....))))))).)).........(((((.......(((....(((.....)))))).......))))).........))))).)).))..))))))).)))))))...)))...)..
novel_mir_28	0	6	TAGTGCAACCTATCGTGTAGA	21	CL8439.Contig2_All:284:539:-	-95.8	AACCTCCTAATAGTGCAACCTATCGTGTAGACTTCCCATGTGGGTGTCCAACCTATCCTGACCCACCTCAGTTGGAGAGCTTAGCAGAAGCACGACTTATAGAACCACCCAGAAAGGTGAGGAAATAGGTGGCATATCTAACCACTATGTTGGGCAATATGAGTTCGAGAGATCGCGCAACAGTCACAAGGTGTGTGGGATATGTTGGACATCCATATCAATAAGTTTACGCAATAAGGTGCACTATCATGAGATT	256	...(((...((((((((.(((((.((((((((((...(((((((((((((((.((((((.((.(((((..((((((..((((.....)))).(.((((((....(((((......)))).)...)))))).)....)))))).....(((((.((.....((..((....)))))).)))))......))))).)))))))).)))))))))))))))....)))))))))).)).)))))))))))...)))...
novel_mir_37	0	6	ATTTACTGAGTATGATGATGATA	23	Unigene49487_All:16:265:-	-77.2	GGATTTACTGAGTATGATGATGATAATGATTTTTCCCACACGTTATCTGTAATGCTTGTTGGGGTATAGGCTTCAGTCCACATTGGGCCAAGCCGATTAGGACTGGGGCAAACAGGGTTTTGGCCTGCCCTAACATCACCGGCCCAGTTTGTTTAATTTGTTGATTAAGTCAGCAAAGGGATTAACCCTAATTTGTTTGCTTATAAATGATCTCATTTTACTTGTAAACAATCATCACTCAGTTAAATAT	250	..(((((((((((..((((((........((..((((..(((....(((....((((((((((((....((((((((((..(((((......)))))..)))))))))).....((((....))))))))))))).....))).)))..)))....(((((((((...)))))))))))))..))........(((((((....(((((....))))).....))))))))))))))))))).)))))..
novel_mir_31	0	5	TCCATCTTTGCACGAAGGCG	20	Unigene17430_All:201:376:+	-67.9	TTAACGTCCCTCCATCTTTGCACGAAGGCGACAATTCTCACCACAAAAAGTCGTAAGCCTCTAGGTGTGCCAATGGCATTCTTATGTACAAGTGATGTTCGCTTCTGAAAAAACTAGGAGAACAATGTTCTGCAGTGAGAAGTGTCGCCTCCGTGCAAACGACGGAGGAACATCAA	176	.....((.(((((.((((((((((.((((((((.(((((((.........(((.((((...((((.(((((...))))).))))...(((.....)))..)))).)))........(.(((((...))))).).))))))).)))))))).)))))))).)).))))).)).....
novel_mir_25	0	5	AGGTGACTGATGCTAAAGGACA	22	CL4636.Contig1_All:92:192:-	-26.5	GGCAAAAATAAGGTGACTGATGCTAAAGGACATTCCATGGCTAGGGGCGGGGGAGTTTTCATGGTGTTATGTTTTGAAGGGGTTTCACTTTTATTTTTCCA	101	((.(((((((((((((..(((.((..(((((((.((((((....((((......))))))))))....)))))))...)).))))))).))))))))))).
novel_mir_6	5	0	TCTGATCACATGGTCCTGGCTC	22	CL3243.Contig3_All:155:296:+	-46.1	ATGGGTTTGTCTGTCAGACAACCATGTGACCATGCCAATGACCCATCAGATGGGCAGGCAACGATCCTCTACTGAACCATGGTCAAGACCATGAGCTCTGTTAATCACGCTCTGATCACATGGTCCTGGCTCATCAACCAGA	142	...((((.((..(((((...(((((((((.((((((..((.(((((...)))))))))))..(((.....((.((.(((((((....)))))).).)).))..)))......)).))))))))).)))))..)).))))...
novel_mir_30	0	5	TTTGTTCTTAGTAGCCTTCCA	21	Unigene10883_All:153:314:-	-47.2	TGATGACATTTCAAAAGGCTATTGAGTACAAAAGTAAATGTTGAATAATGGAAAGAGGTGTTGAATGTGAGATATGAAGATTCGACAAGGGAATGAAGACTACACTAAGATATTGTTATTCTTCAGTTGTTTTTGTTCTTAGTAGCCTTCCAAAATGTTATC	162	.((((((((((...((((((((((((.((((((((((.((..((((((..(.......((((((((.(.........).))))))))............((......))...)..))))))..)).)))))))))).))))))))))))...))))))))))
novel_mir_33	0	5	AGAGATCATACTGAGAAACAGAA	23	Unigene341_All:169:349:+	-35.8	AGATGATGATAGAGATCATACTGAGAAACAGAATAATTCCGTACGGGTACAACTTTTATTTGAACGAAGCGAAAAAAATGCGATCTTTGTTGTCTAATAGAACAAAGACTAATACCTTAATTGAGTCGGTCAAGATCAAATCTGTTTATCAAAGTGCTTCTCTGATTGCTCAAGATATCTC	181	(((((.(((((((((.(((..(((.(((((((.....(((....)))...........(((((.(((..(((...........((((((((.(.....).))))))))............)))..))).)))))......))))))).)))..)))..)))))).....)))...))))).
